# Supplementary material
Source: PubMed Central journal article supplement (PMC7035995)

**Acute Elevations in Cortisol Increase the In Vivo Binding of [<sup>11</sup>C]NOP-1A to Nociceptin Receptors: A Novel Imaging Paradigm to Study the Interaction Between Stress and Anti-stress Regulating Neuropeptides**

***Supplemental Information***

**Figure S1** shows the relationship between hydrocortisone-induced decreases in SDNN and hydrocortisone-induced increases in [<sup>11</sup>C]NOP-1A V<sub>T</sub>

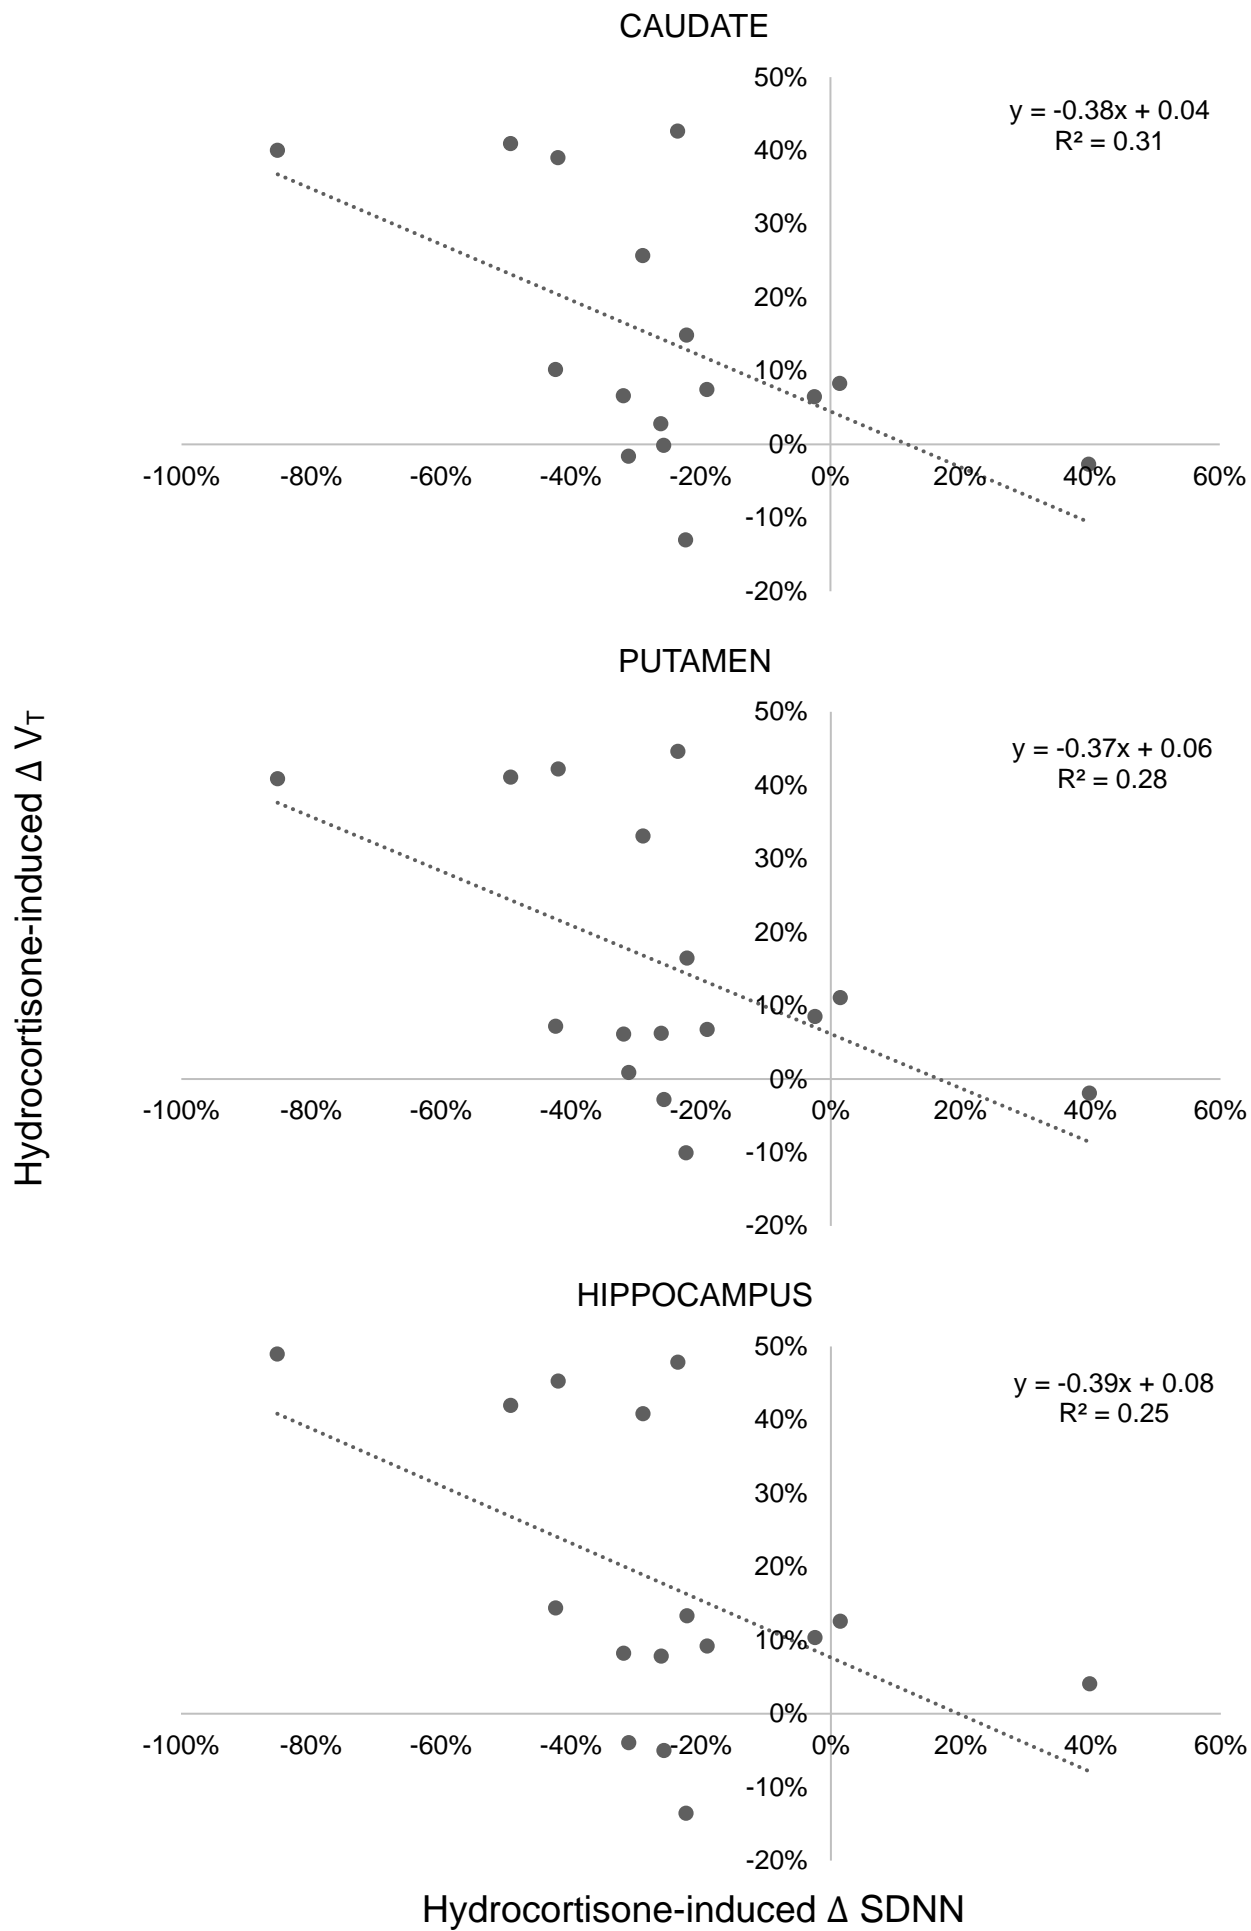

Figure S2 shows the within subject change in [<sup>11</sup>C]NOP-1A V<sub>T</sub> in three representative regions following the hydrocortisone challenge.

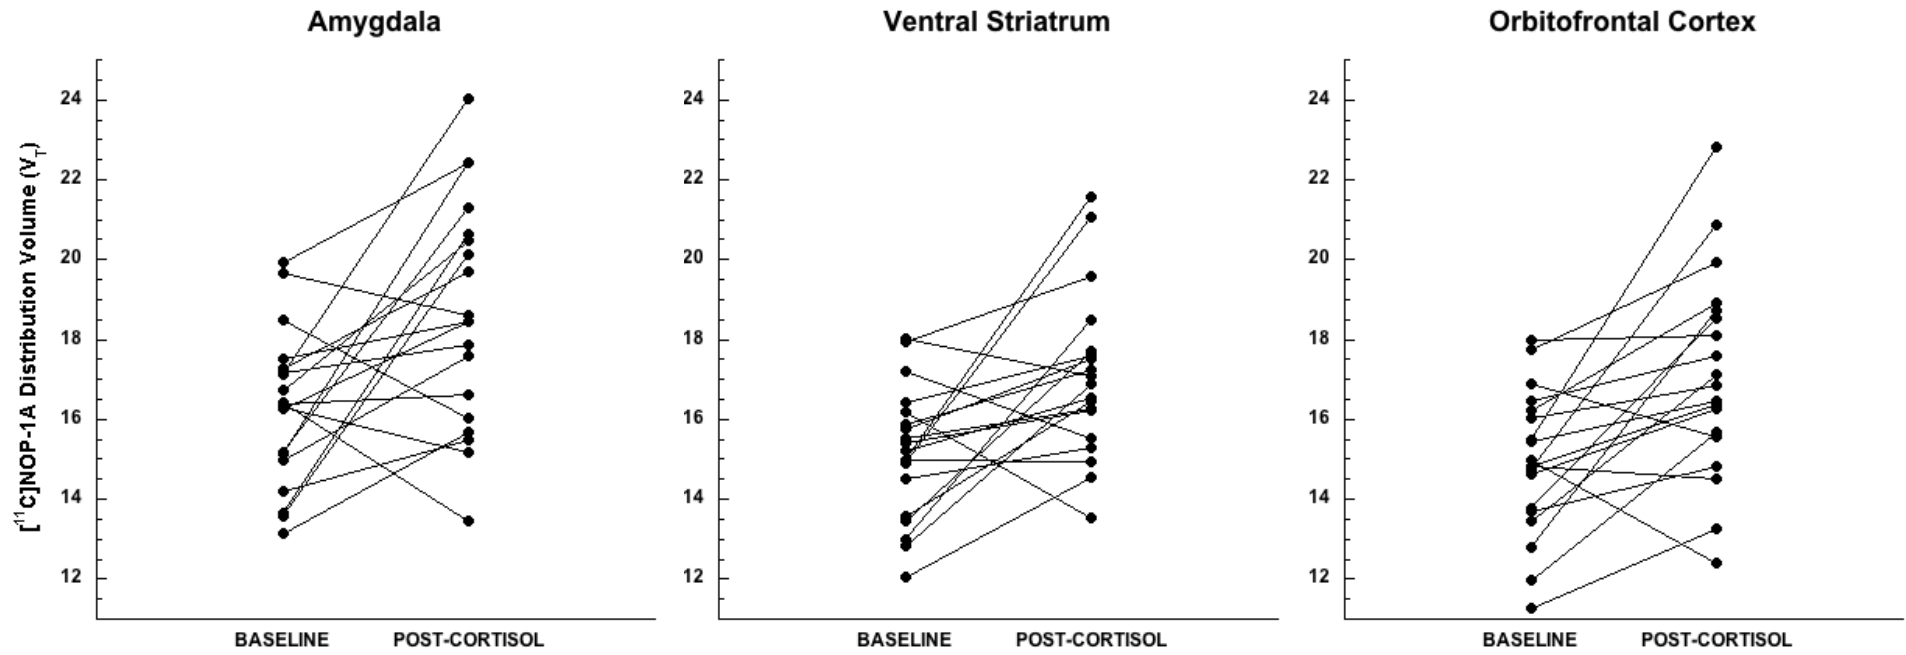

Supplement: NIHMS1543258-supplement-2.pdf [file NIHMS1543258-supplement-2.pdf]
